# Supplementary material for: Targeting folate receptor beta on monocytes/macrophages renders rapid inflammation resolution independent of root causes
Source: PubMed Central journal article supplement — Cell Rep Med. 2021 Oct 19;2(10):100422. doi: 10.1016/j.xcrm.2021.100422 (PMC8561236; doi:10.1016/j.xcrm.2021.100422), 2021-10-19
Supplement: mmc1.pdf [file mmc1.pdf]

**Cell Reports Medicine, Volume 2**

**Supplemental information**

**Targeting folate receptor beta**

**on monocytes/macrophages renders rapid**

**inflammation resolution independent of root causes**

**Yingjuan J. Lu, Leroy W. Wheeler II, Haiyan Chu, Paul J. Kleindl, Michael Pugh, Fei You, Satish Rao, Gabriela Garcia, Henry Y. Wu, Andre P. da Cunha, Richard Johnson, Elaine Westrick, Vicky Cross, Alex Lloyd, Christina Dircksen, Patrick J. Klein, Iontcho R. Vlahov, Philip S. Low, and Christopher P. Leamon**

## SUPPLEMENTARY INFORMATION

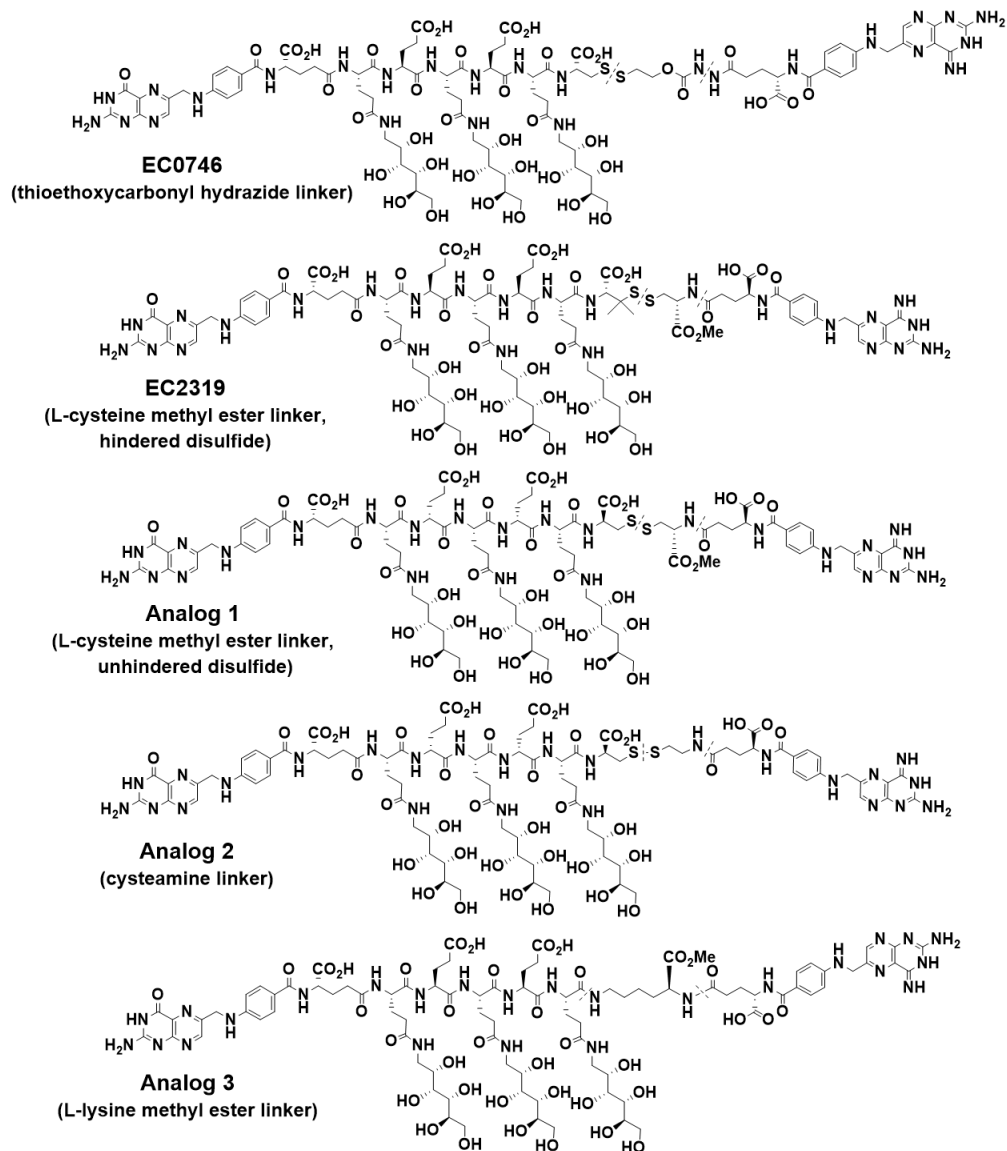

**Figure S1. Structures of EC0746, EC2319 and Synthetic Analogs.** Shown in parentheses are important structural distinctions for each compound. Linker regions are highlighted by the dashed lines. Related to Figures 1-2.

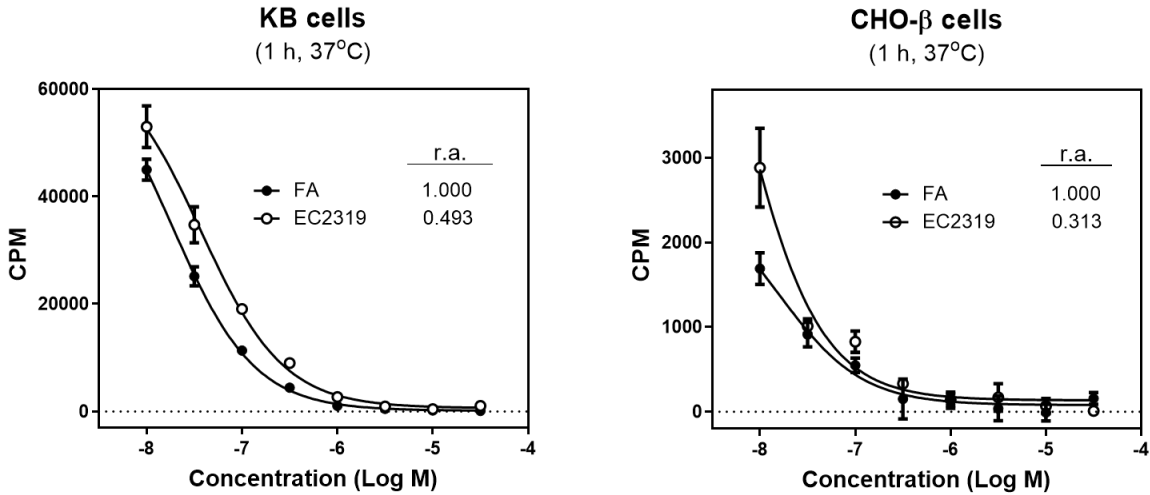

**Figure S2. EC2319 FR-binding Affinities.** EC2319 was directly competed against  $^3\text{H}$ -FA for binding to KB and CHO- $\beta$  cells. The relative affinity (r.a.) value was defined as the inverse molar ratio of compound required to displace 50% of  $^3\text{H}$ -FA bound to the cells. Related to Figure 1.

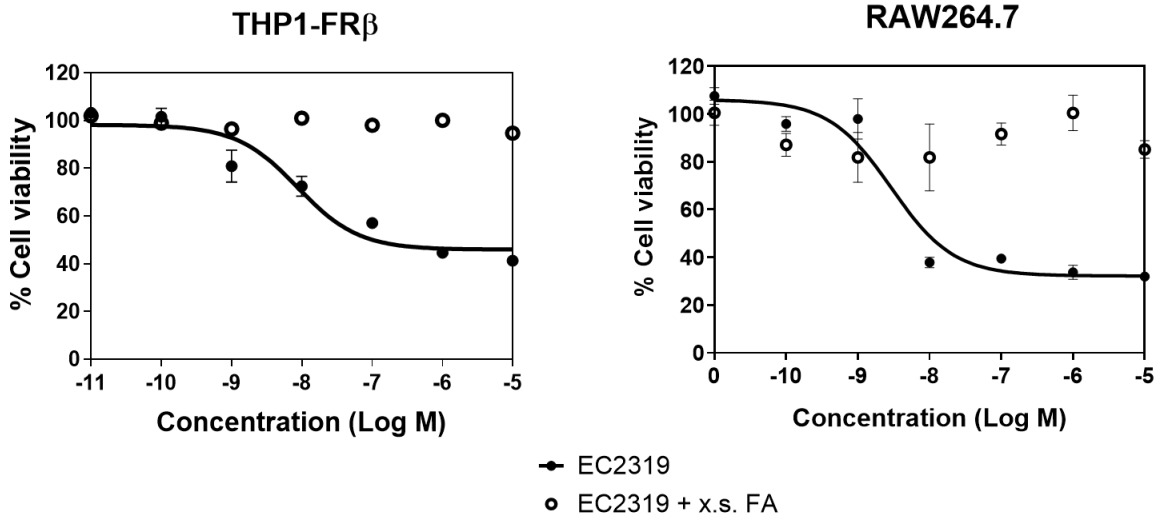

**Figure S3. EC2319 Cytostatic Effect on FR $^+$  Monocytes and Macrophages.** THP1-FR $\beta$  and RAW264.7 cells were exposed to EC2319 at 10-fold serial increases in concentration and without or with excess FA as the competitor. The cell viability (%) was quantified by tetrazolium-based XTT assay kit according to the manufacturer's protocol (SEM, n = 3). Related to Figures 5-7.
